# Supplementary material for: The Design and Preclinical Evaluation of a Single-Label Bimodal Nanobody Tracer for Image-Guided Surgery
Source: MDPI journal article supplement (doi:10.3390/biom11030360), 2021-02-26
Supplement: s1 [file s1]

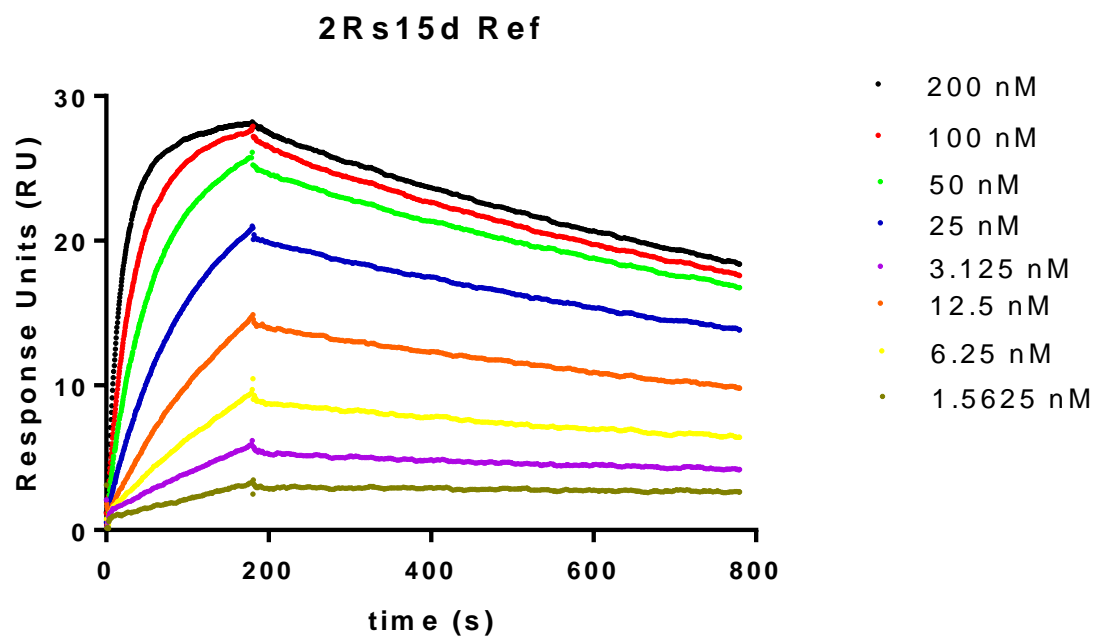

**Figure S1:** SPR graphs of reference unconjugated 2Rs15d on immobilized HER2-Fc protein. Affinity determined as  $3.2 \pm 0.1$  nM.

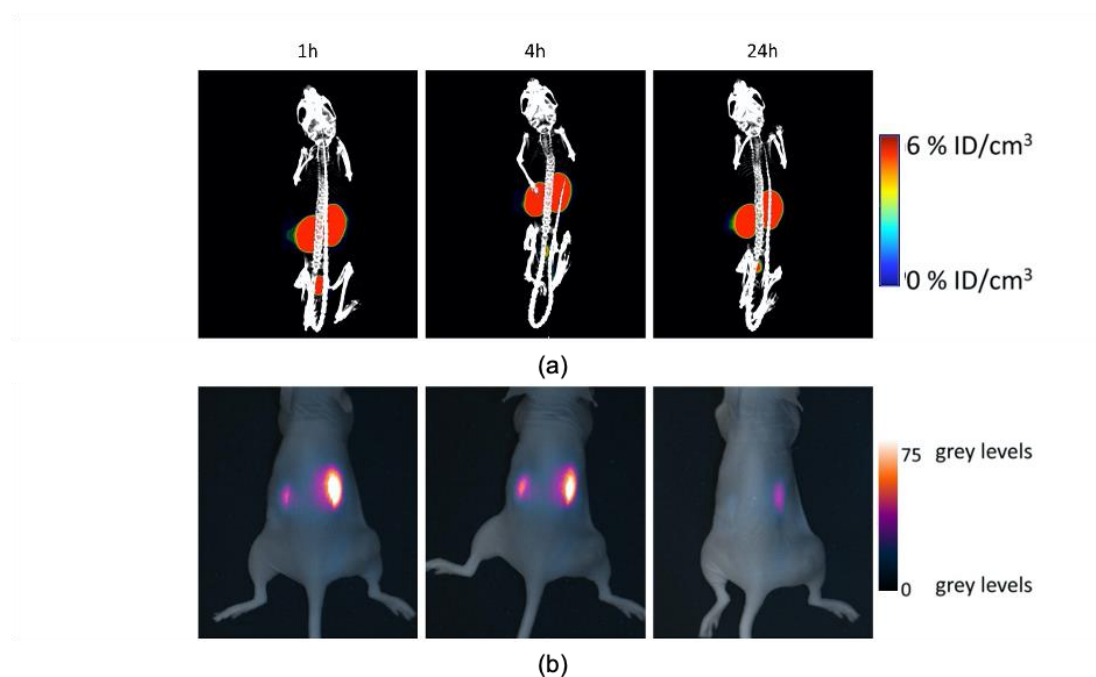

**Figure S2:** SPECT/CT (a) and fluorescence (b) images of mice bearing MDA-MB-435S xenografts at different timepoints post-injection of [<sup>111</sup>In]-MSAP.2Rs15d.

**Table S1:** Tumour-to-organ ratios calculated from *ex vivo* biodistribution at 24h post-injection of [<sup>111</sup>In]-MSAP.2Rs15d in mice bearing subcutaneous SKOV3 xenografts (N = 3).

| Tumour-to-organ ratio | Gamma-counting | Fluorescence imaging |
|-----------------------|----------------|----------------------|
| Blood                 | 54.5 ± 6.2     | NA                   |
| Liver                 | 4.5 ± 0.5      | 5.4 ± 2.5            |
| Spleen                | 7.4 ± 0.8      | 10.3 ± 5.5           |
| Pancreas              | 13.3 ± 1.5     | 6.0 ± 2.7            |
| Kidney                | 0.020 ± 0.002  | 0.1 ± 0.1            |
| Intestine             | 18.7 ± 2.1     | 3.1 ± 1.7            |
| Heart                 | 16.8 ± 1.9     | 9.8 ± 4.4            |
| Lungs                 | 16.8 ± 1.9     | 7.5 ± 3.4            |
| Muscle                | 32.3 ± 3.6     | 10.8 ± 4.8           |
| Stomach               | 19.6 ± 2.2     | 0.9 ± 0.4            |
| Tumor                 | 1 ± 0.1        | 1.0 ± 0.6            |

**Table S2:** Tumour-to-organ ratios calculated from *ex vivo* biodistribution at 24h post-injection of [<sup>111</sup>In]-MSAP.2Rs15d in mice bearing subcutaneous MDA-MB-435S xenografts (N = 3).

| Tumour-to-organ ratio | Gamma-counting  | Fluorescence imaging |
|-----------------------|-----------------|----------------------|
| Blood                 | 5.9 ± 3.5       | NA                   |
| Liver                 | 0.2 ± 0.1       | 0.6 ± 0.3            |
| Spleen                | 0.5 ± 0.3       | 1.3 ± 0.6            |
| Pancreas              | 0.7 ± 0.4       | 0.8 ± 0.4            |
| Kidney                | 0.0009 ± 0.0005 | 0.015 ± 0.008        |
| Intestine             | 0.8 ± 0.5       | 0.2 ± 0.1            |
| Heart                 | 0.7 ± 0.4       | 1.2 ± 0.6            |
| Lungs                 | 0.8 ± 0.5       | 0.8 ± 0.4            |
| Muscle                | 0.7 ± 0.4       | 1.0 ± 0.5            |
| Stomach               | 0.8 ± 0.5       | 0.10 ± 0.05          |
| Tumor                 | 1.00 ± 0.09     | 1.0 ± 0.7            |

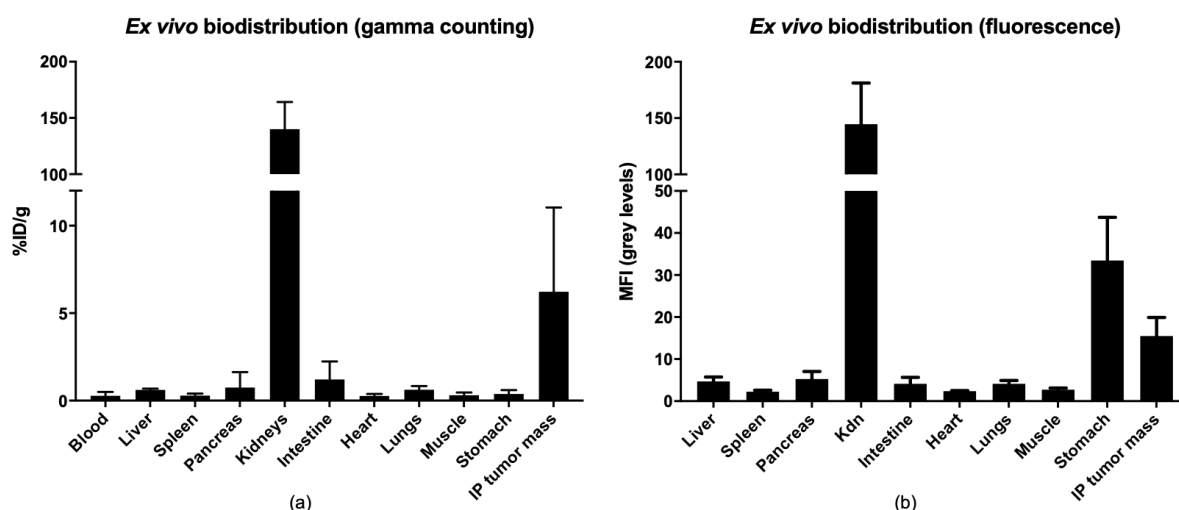

**Figure S3:** *Ex vivo* biodistribution of mice bearing SKOV3.IP1 intraperitoneally disseminated tumour lesions as determined by SPECT/CT (a) and (b) fluorescence imaging. All data is represented as mean ± SD (N = 3). Limited uptake in pancreas and intestine can be attributed to the presence of tumour small lesions in these organs.

**Table S3:** Tumour-to-organ ratios calculated from *ex vivo* biodistribution at 1h post-injection of [<sup>111</sup>In]-MSAP.2Rs15d in mice bearing intraperitoneally disseminated SKOV3.IP1 tumours (N = 3).

| Tumour-to-organ ratio | Gamma counting | Fluorescence imaging |
|-----------------------|----------------|----------------------|
| Blood                 | 65.8 ± 47.5    | NA                   |
| Liver                 | 10.5 ± 7.0     | 3.4 ± 1.0            |
| Spleen                | 22.1 ± 10.8    | 7.3 ± 2.4            |
| Pancreas              | 20.6 ± 13.4    | 3.1 ± 0.9            |
| Kidney                | 0.1 ± 0.1      | 0.1 ± 0.1            |
| Intestine             | 6.1 ± 2.5      | 3.9 ± 0.8            |
| Heart                 | 23.1 ± 9.2     | 6.5 ± 1.6            |
| Lungs                 | 10.0 ± 5.2     | 3.9 ± 1.1            |
| Muscle                | 18.9 ± 3.8     | 6.0 ± 2.1            |
| Stomach               | 18.7 ± 11.4    | 0.5 ± 0.1            |

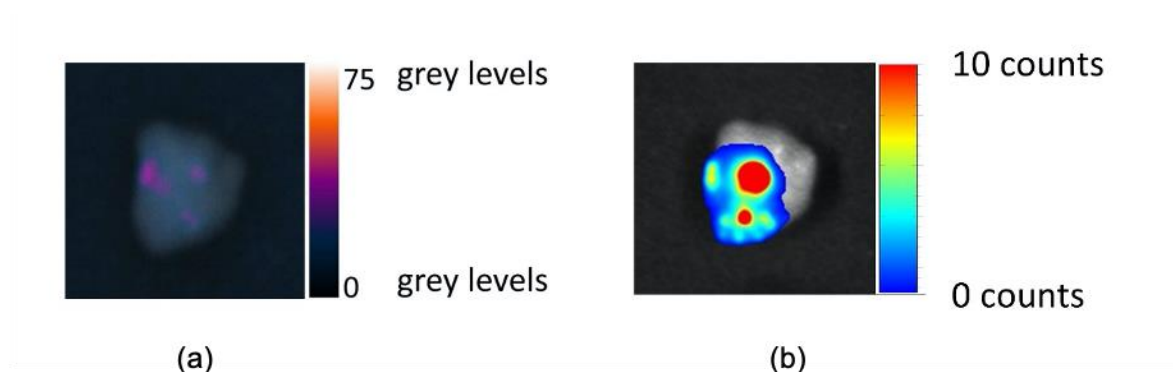

**Figure S4:** *Ex vivo* imaging of resected pancreas from SKOV3.IP1 intraperitoneally disseminated tumour bearing mouse. Presence of tumour nodules identified by fluorescence imaging (a) and confirmed by bioluminescence imaging (b).
